# Supplementary material for: Genetic Association of NPY Gene Polymorphisms with Dampness-Phlegm Pattern in Korean Stroke Patients
Source: PubMed Central journal article supplement (PMC3205675; doi:10.1155/2012/109796), 2011-10-29
Supplement: 109796.f1.pdf [file 109796.f1.pdf]

Supplemental table 1. Demographic parameters of study subjects

| Characteristics                       | Normal       | Case*        | sig.             |
|---------------------------------------|--------------|--------------|------------------|
| N                                     | 498          | 599          |                  |
| <i>anthropometric characteristics</i> |              |              |                  |
| sex (M/F)                             | 215/283      | 330/269      | <b>&lt;.0001</b> |
| age (year)                            | 60.76±9.77   | 66.25±12.28  | <b>&lt;.0001</b> |
| smoking (none/stop/active)            | 241/214/43   | 333/102/164  | <b>&lt;.0001</b> |
| drinking (none/stop/active)           | 298/31/168   | 313/73/212   | <b>0.0013</b>    |
| WHR                                   | 0.88±0.06    | 0.93±0.06    | <b>&lt;.0001</b> |
| weight (kg)                           | 61.74±9.15   | 61.43±11.34  | NS               |
| waist circumference (cm)              | 83.61±8.38   | 85.56±9.86   | <b>0.0026</b>    |
| <i>TOAST classification</i>           |              |              |                  |
| LAA                                   | -            | 94           | ND               |
| CE                                    | -            | 23           |                  |
| SVO                                   | -            | 360          |                  |
| SOE                                   | -            | 11           |                  |
| SUE                                   | -            | 18           |                  |
| <i>medical history</i>                |              |              |                  |
| hypertension (Yes,%)                  | 60(12.07)    | 337(56.83)   | <b>&lt;.0001</b> |
| <i>blood parameter</i>                |              |              |                  |
| GOP (U/ml)                            | 27.56±19.97  | 26.91±20.59  | NS               |
| GPT (U/ml)                            | 26.04±20.26  | 25.79±23.97  | NS               |
| total cholesterol (mg/dL)             | 202.23±40.04 | 185.32±44.06 | <b>&lt;.0001</b> |
| triglyceride (mg/dL)                  | 139.88±69.80 | 150.17±97.59 | NS               |
| HDL-cholesterol (mg/dL)               | 52.28±12.69  | 45.55±13.68  | <b>&lt;.0001</b> |
| LDL-cholesterol (mg/dL)               | 121.19±36.70 | 113.69±38.48 | <b>0.0019</b>    |
| bloog sugar (mg/dL)                   | 99.75±10.79  | 111.18±32.64 | <b>&lt;.0001</b> |

All results except sex, TOAST categories, smoking, drinking and hypertension are expressed as mean ± SD for continuous variables. NS: not significant. ND: not done. WHR: waist hip ratio. TOAST: Trial of ORG 10172 in Acute Stroke Treatment. LAA: large-artery atherosclerosis. CE: cardioembolism. SVO: small-vessel occlusion. SOE: stroke of other etiology. SUE: stroke of undetermined etiology. GOP: glutamate oxaloacetate transaminase. GPT: glutamate pyruvate transaminase. \* : cerebral infarction patients. sig. : P-value using a Student's t-test or Wilcoxon rank-sum test in continuous variables, chi-square test or Fisher's exact test in categorical variables. P-values with statistical significance were presented in bold.

Supplemental table 2. Primer sets for PCR amplification and sequencing in promoter and exon regions of *NPY* gene

| region                 | PCR amplification primer |           |                        | sequencing primer |                      |                        |
|------------------------|--------------------------|-----------|------------------------|-------------------|----------------------|------------------------|
|                        | location                 | direction | sequence               | location          | direction            | sequencing             |
| promoter<br>+<br>exon1 | ,-2071                   | forward   | CACATGGACCTTTACCGGTT   | -2071             | forward              | CACATGGACCTTTACCGGTT   |
|                        | 1349                     | reverse   | GTGCCTGATACTGTCCTGC    | -1749             | forward              | CCTCAGAATAAGTTCTTATTC  |
|                        |                          |           |                        | -1239             | forward              | AGAATCACTTGTCTTTTAGCA  |
|                        |                          |           |                        | -280              | reverse              | CCAAAGCCCAAGTATCTGCCCT |
|                        |                          |           | +243                   | reverse           | TAGCCGCCAAGAGGGCTGGT |                        |
| Exon 2                 | ,-2071                   | forward   | CACATGGACCTTTACCGGTT   | +1349             | reverse              | GTGCCTGATACTGTCCTGC    |
|                        | 1349                     | reverse   | GTGCCTGATACTGTCCTGC    |                   |                      |                        |
| Exon 3                 | 5223                     | forward   | CATATCCCAAATAGGAGACTAT | +5223             | forward              | CATATCCCAAATAGGAGACTAT |
|                        | 5482                     | reverse   | CCCTAGTCTAGAAGCCTGGT   |                   |                      |                        |
| Exon 4                 | 7730                     | forward   | CAGTTCCCGGTCATCTTCA    | +7760             | reverse              | CTGAATCTGCTAGTTGAGGG   |
|                        | ,+7760                   | reverse   | CTGAATCTGCTAGTTGAGGG   |                   |                      |                        |

Supplemental table 3. Primer sets for PCR amplification and genotyping of each SNPs

| SNPs    |         | PCR amplification primer | genotyping primer        |
|---------|---------|--------------------------|--------------------------|
| G-1484A | forward | GAATCAAGCTATGAACCTGCTATC | aatagaagatgtttgcactttacc |
|         | reverse | GTGTAGAGTGTGCCCTGTACAAA  |                          |
| C-1471T | forward | GAATCAAGCTATGAACCTGCTATC | agt tgctcgggggtgcttac    |
|         | reverse | GTGTAGAGTGTGCCCTGTACAAA  |                          |
| C-399T  | forward | GAATCAAGCTATGAACCTGCTATC | tcctccaacaggactacca      |
|         | reverse | GTGTAGAGTGTGCCCTGTACAAA  |                          |
| A1201G  | forward | GAATCAAGCTATGAACCTGCTATC | ggacatggccagatactactc    |
|         | reverse | GTGTAGAGTGTGCCCTGTACAAA  |                          |
| C5325T  | forward | CATTACCCAAATAGGAGACTAT   | tgaatcagtgtctctgggct     |
|         | reverse | CACCTTGAGCTCTGCAACAATG   |                          |
